# Supplementary material for: One-pot assembly of metal/organic-acid sites on amine-functionalized ligands of MOFs for photocatalytic hydrogen peroxide splitting
Source: Royal Society of Chemistry journal article supplement (doi:10.1039/c6cc02453j), 2016-01-01
Supplement: c6cc02453j1.pdf [file c6cc02453j1.pdf]

1  
2  
3  
4  
5  
6  
7  
8  
9  
10  
11  
12  
13  
14  
15  
16  
17  
18  
19  
20  
21  
22  
23  
24

## Supporting Information

### **One-pot assembly of metal/organic-acid sites on amine-functionalized ligands of MOFs for photocatalytic hydrogen peroxide splitting**

Lei Qin,<sup>a</sup> Zhaowen Li,<sup>a</sup> Qiong Hu,<sup>a</sup> Zehai Xu,<sup>a</sup> Xinwen Guo<sup>b</sup> and Guoliang Zhang<sup>\*,a</sup>

<sup>a</sup> *Institute of Oceanic and Environmental Chemical Engineering, State Key Lab Breeding Base of Green Chemical Synthesis Technology, Zhejiang University of Technology, Hangzhou 310014, China*

<sup>b</sup> *State Key Laboratory of Fine Chemicals, Department of Catalysis Chemistry and Engineering, Dalian University of Technology, Dalian 116012, China*

Tel/Fax: 86-571-88320863; E-mail: [guoliangz@zjut.edu.cn](mailto:guoliangz@zjut.edu.cn)

## 25 EXPERIMENTAL SECTION

26 **Chemicals.** All reagents were purchased commercially and used without further purification.  
27 All chemicals, such as terephthalic acid ( $\text{HOOC-C}_6\text{H}_4\text{-COOH}$ , 99 %), 2-amino terephthalic acid  
28 ( $\text{HO}_2\text{C-C}_6\text{H}_3\text{NH}_2\text{-CO}_2\text{H}$ ), N,N-dimethylformamide ( $(\text{CH}_3)_2\text{NCHO}$ ), aluminum chloride  
29 hexahydrate ( $\text{AlCl}_3 \cdot 6\text{H}_2\text{O}$ ), aluminum nitrate nonahydrate ( $\text{Al}(\text{NO}_3)_3 \cdot 9\text{H}_2\text{O}$ ), aqueous hydrofluoric  
30 acid (HF, 40 %) , ethanol amine, ferric nitrate ( $\text{Fe}(\text{NO}_3)_3 \cdot 9\text{H}_2\text{O}$ ), hydrochloric acid (HCl, 35  
31 wt. %), ethanol, benzene ( $\text{C}_6\text{H}_6$ , 99.5%), acetonitrile (MeCN, 99% ), hydrogen peroxide ( $\text{H}_2\text{O}_2$ ,  
32 30%) and dichloromethane ( $\text{CH}_2\text{Cl}_2$ , 99.5%) were of analytical grade and were purchased from  
33 Sinopharm chemical Reagent Co, China. All experiment solutions were prepared from deionized  
34 water manufactured by a self-made RO-EDI system, in which ion concentration was analyzed and  
35 controlled by IRIS Intrepid ICP and Metrohm 861Compact IC.

36 **Synthesis of  $\text{NH}_2\text{-MIL-101(Al)}$ .** The  $\text{NH}_2\text{-MIL-101(Al)}$  was synthesized by means of a  
37 solvothermal treatment involving N, N-dimethylformamide (DMF) as solvent. Starting reactants  
38 were aluminum chloride hexahydrate, 2-amino terephthalic acid and N, N-dimethylformamide.  
39 The reactants were placed into a 50 mL Teflon-lined autoclave and heated for 72 h at 403 K in an  
40 oven under static conditions. The resulting yellow powders were isolated under centrifugation and  
41 washed with acetone. To remove organic species trapped within the pores, the samples were  
42 stirred in methanol overnight and dried at 353 K after washed by methanol for several times.

43 **Synthesis of  $\text{NH}_2\text{-MIL-53(Al)}$ .** In a typical synthesis, aluminum chloride hexahydrate and  
44 2-amino terephthalic acid were dissolved in a certain amount of N,N-dimethylformamide, while  
45 the volume of solvent was kept constant at 30 mL. The mixture was introduced into a 50 mL  
46 Teflon-lined steel autoclave and placed in an oven at 423 K for 24h under static conditions. After

47 cooling down, the yellow solid products were isolated by centrifugation. Then the products were  
48 activated in DMF for 5h in a Teflon-lined steel autoclave in order to remove the remaining water  
49 molecules or unreacted ligands trapped in the pores. Finally, the product was isolated by repeated  
50 centrifugation and washed with dimethyl ketone for 3 times. The resulting solids were all white  
51 and dried overnight at 353 K.

52 **Synthesis of MIL-53(Al).** The synthesis was carried out under mild hydrothermal conditions  
53 using aluminum nitrate nonahydrate, 1,4-benzenedicarboxylic acid and deionized water. The  
54 reaction was performed in Teflon-lined stainless steel under autogenous pressure for 3 days at 493  
55 K. The molar composition of the starting gels was 1 Al (1.30 g): 0.5 BDC (0.288 g): 80 H<sub>2</sub>O. The  
56 white product was centrifugated and cleaned with deionized water and dried at 353 K.

57 **Synthesis of CFH@Al-MOFs.** In a typical synthesis, NH<sub>2</sub>-MIL-101(Al), NH<sub>2</sub>-MIL-53(Al) or  
58 MIL-53(Al) was activated at 353 K under vacuum, and 1 g of which was dispersed on glass plate.  
59 The deionized water solution containing Fe(NO<sub>3</sub>)<sub>3</sub> (0.007 mol L<sup>-1</sup>) and a certain amount of citric  
60 acid (The molar composition of the starting gels was 1 Fe<sup>3+</sup>: 1.5 CA) were sprayed on the  
61 Al-MOFs under certain temperature. The obtained powders were washed with distilled water for  
62 three times and dried under 353 K to acquire CFH@NH<sub>2</sub>-MIL-101(Al). Then the as-synthesized  
63 samples were treated in a stream of air at 473 K for 4h to yield the CFH@NH<sub>2</sub>-MIL-101(Al),  
64 CFH@NH<sub>2</sub>-MIL-53(Al) and CFH@MIL-53(Al) subsequently.

65 **Synthesis of FH@Al-MOFs.** The pathway used to fabricate FH@MOFs was similar to the  
66 synthesis of CFH@Al-MOFs but without CA in the sparing solution. The final samples were  
67 marked as FH@MIL-53(Al), FH@NH<sub>2</sub>-MIL-53(Al) and FH@MIL-53(Al), respectively.

68 **Synthesis of CFH@ P25, Clay, and meso NH<sub>2</sub>-SiO<sub>2</sub> sphere.** The route used to fabricate

69 CFH@ P25, Clay, and meso  $\text{NH}_2\text{-SiO}_2$  is similar to the synthesis of CFH@Al-MOFs.

70 **Characterization.** The surface morphology of the prepared samples was evaluated by Hitachi  
71 JEM-1200EX transmission electron microscopy (Hitachi, Japan) and JEM-2100 transmission  
72 electron microscopy (Jeol, Japan) and Tecnai G2 F30 S-Twin high resolution transmission electron  
73 microscopy (Philips-FEI, Holland). Fourier Transform Infrared (FTIR) spectrophotometers of the  
74 samples were recorded by the KBr disk technique with Nicole 6700 Fourier transform infrared  
75 spectrometer (Thermo, USA). The X-ray diffraction (XRD) of the nanocomposites was  
76 determined by X'Pert PRO X-ray diffractometer (PANalytical, Cu  $K\alpha$  radiation). Nitrogen  
77 adsorption-desorption isotherms were obtained by an ASAP 2020 surface area and porosity  
78 analyzer (Micromeritics, USA) at 77 K. Energy dispersive spectroscopy (Hitachi, S-3700N, Japan)  
79 was taken for the composition detection of different samples. The X-ray photoelectron  
80 spectroscopy (XPS) experiments were carried out on a RBD upgraded PHI-5000C ESCA system  
81 (Perkin Elmer) with Mg  $K\alpha$  radiation ( $h\nu=1253.6\text{eV}$ ), and binding energies were calibrated by  
82 using the containment carbon ( $\text{C}1\text{s}=284.6\text{eV}$ ). The compositional analysis of catalysts was  
83 performed by ICP-AES in an Optima 2000 instrument (PerkinElmer, USA) after the samples  
84 microwave digestion in acid solution.

85 **Catalytic experiments.** The generation of OH radicals was analyzed by the direct  
86 hydroxylation of benzene to phenol. The experiments were initiated by adding 6 mL MeCN, 4.0  
87 mL  $\text{H}_2\text{O}_2$ , 1.8 mL benzene and 0.01 g prepared catalysts under visible light irradiation (200 W  
88 halogen lamp, emission wavelength: 350-450 nm) and stirred for 5 h at 333 K. 0.5 mL of  
89 suspension was sampled and filtered through microfiltration membrane to separate catalysts, and  
90 which was then extracted by  $\text{CH}_2\text{Cl}_2$ . The mixture was analyzed by HPLC (Shimadzu, GC2014).

91

92

**Table S1** Corresponding EDS results of the different samples

| Sample                           | Element | Atom % | Element WT % |
|----------------------------------|---------|--------|--------------|
| CFH@MIL-53(Al)                   | C-K     | 58.12  | 48.77        |
|                                  | O-K     | 36.15  | 40.40        |
|                                  | Al-K    | 5.73   | 10.80        |
|                                  | Fe-K    | 0.01   | 0.004        |
| CFH@NH <sub>2</sub> -MIL-53(Al)  | C-K     | 55.14  | 45.14        |
|                                  | O-K     | 37.75  | 41.17        |
|                                  | Al-K    | 6.79   | 12.40        |
|                                  | Fe-K    | 0.31   | 1.20         |
| CFH@NH <sub>2</sub> -MIL-101(Al) | C-K     | 60.25  | 50.84        |
|                                  | O-K     | 34.78  | 39.09        |
|                                  | Al-K    | 4.65   | 8.81         |
|                                  | Fe-K    | 0.32   | 1.25         |

93

94

95

96

97

98

99

100

101

102

103

104

105

106

107

108

**Table S2** Compositions of Fe nanoclusters for sample [Fe-O-C]@NH<sub>2</sub>-MOF

---

| Fe nanoclusters composition | CFH@NH <sub>2</sub> -MIL-53 | CFH@NH <sub>2</sub> -MIL-101 |
|-----------------------------|-----------------------------|------------------------------|
| Fe (wt. %)                  | 0.550                       | 1.66                         |
| C (wt. %)                   | 0.0868                      | 0.260                        |
| O (wt. %)                   | 0.329                       | 0.982                        |

---

109

110

111

112

113

114

115

116

117

118

119

120

121

122

123

124

125

126

127

128

129

130

**Table S3** Surface area, textural data and metal compositions for different samples.

| Sample                           | $S_{\text{BET}}$ ( $\text{m}^2/\text{g}$ ) <sup>a</sup> | $S_{\text{Langmuir}}$ ( $\text{m}^2/\text{g}$ ) <sup>b</sup> | $V_{\text{meso}}$ ( $\text{cm}^3/\text{g}$ ) <sup>c</sup> | Fe loaded<br>( $\text{mg}/\text{g}$ ) <sup>d</sup> |
|----------------------------------|---------------------------------------------------------|--------------------------------------------------------------|-----------------------------------------------------------|----------------------------------------------------|
| MIL-53(Al)                       | 1008.1                                                  | 1436.1                                                       | 0.35                                                      | -                                                  |
| CFH@MIL-53(Al)                   | 920.7                                                   | 1211.3                                                       | 0.32                                                      | 0.16                                               |
| NH <sub>2</sub> -MIL-53(Al)      | 961.7                                                   | 1169.2                                                       | 0.24                                                      | -                                                  |
| CFH@NH <sub>2</sub> -MIL-53(Al)  | 601.2                                                   | 839.2                                                        | 0.19                                                      | 5.50                                               |
| NH <sub>2</sub> -MIL-101(Al)     | 1240.4                                                  | 1810.7                                                       | 0.69                                                      | -                                                  |
| CFH@NH <sub>2</sub> -MIL-101(Al) | 960.8                                                   | 1210.7                                                       | 0.36                                                      | 16.60                                              |

131

<sup>a</sup>  $S_{\text{BET}}$  is the BET specific surface area.

132

<sup>b</sup>  $S_{\text{Langmuir}}$  is the Langmuir specific surface area.

133

<sup>c</sup>  $V_{\text{meso}}$  is the specific mesopore volume obtained from the BJH cumulative specific adsorption volume of pores of 1.70-300.00 nm in diameter.

134

135

<sup>d</sup> Analysis of ICP-MS.

136

137

138

139

140

141

142

143

144

145

146

147

148

149

150

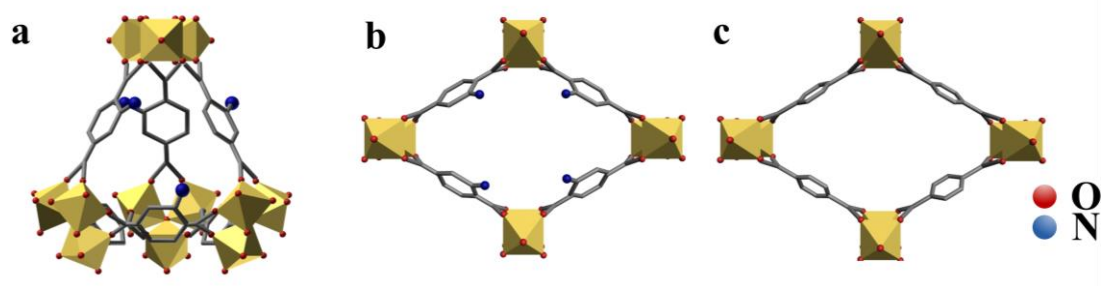

151

152

153

**Figure S1** Structure of  $\text{NH}_2$ -MIL-101 (a),  $\text{NH}_2$ -MIL-53 (b), and MIL-53 (c).

154

155

156

157

158

159

160

161

162

163

164

165

166

167

168

169

170

171

172

173

174



175

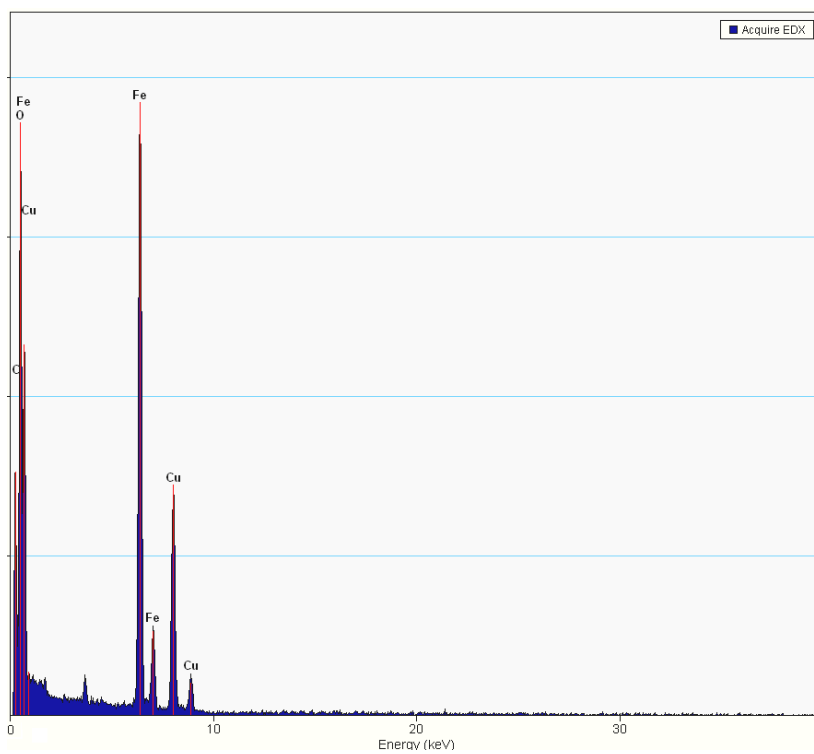

176

177

178

**Figure S2** EDS analysis of Fe based nanoclusters

179

180

181

182

183

184

185

186

187

188

189

190

191

192

193

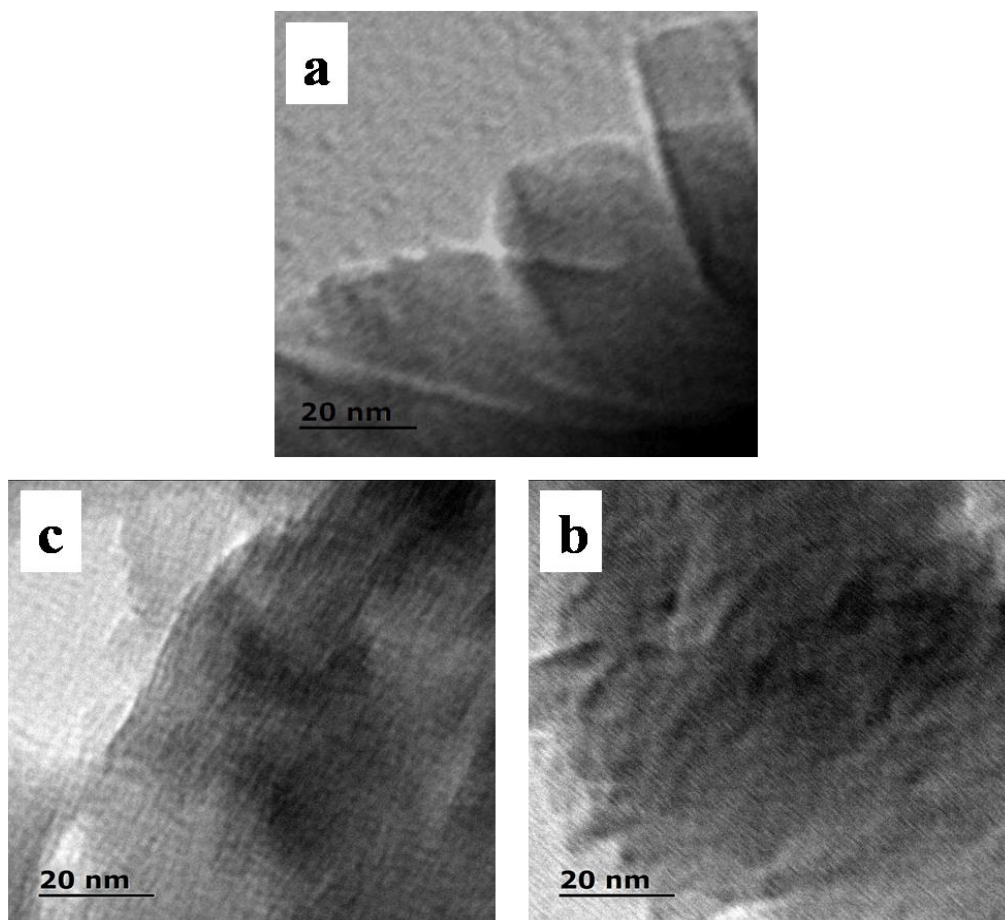

195

196

197 **Figure S3** HRTEM images of CFH@MIL-53 (a); CFH@NH<sub>2</sub>-MIL-53 (b), and

198

CFH@NH<sub>2</sub>-MIL-101 (c).

199

200

201

202

203

204

205

206

207

208

209

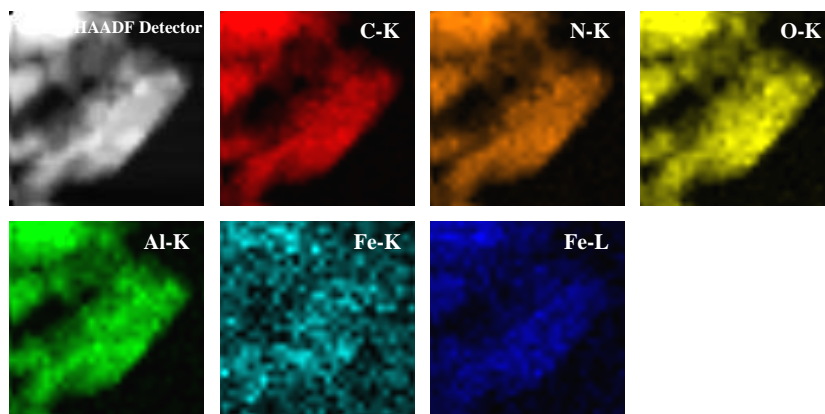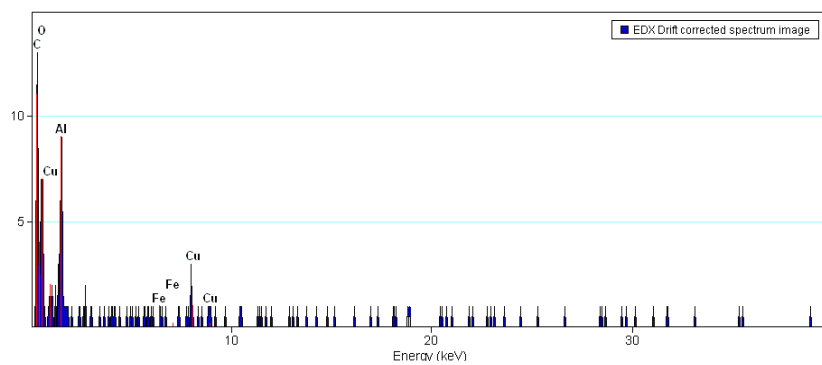

210

211

(a)

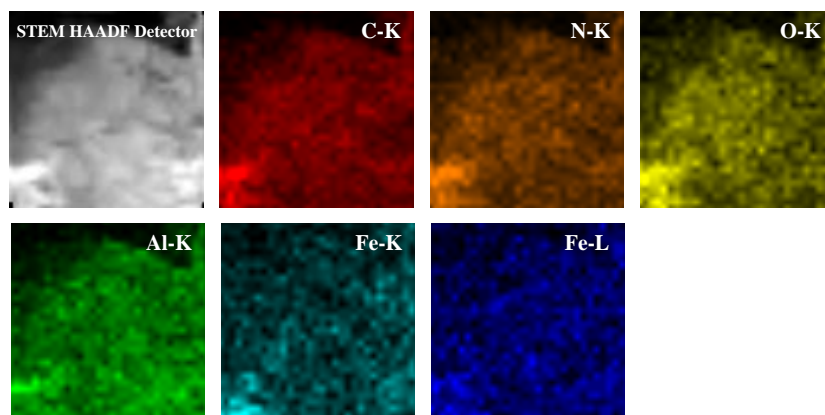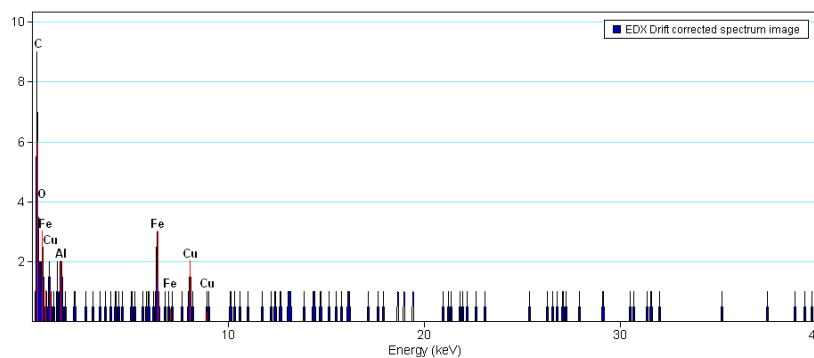

212

213

(b)

214 **Figure S4** STEM-HAADF image of as synthesized [Fe-O-C]@NH<sub>2</sub>-MIL-53 (a) and

215 [Fe-O-C]@NH<sub>2</sub>-MIL-101 (b), and TEM elemental mapping of C, N, Al, O and Fe.

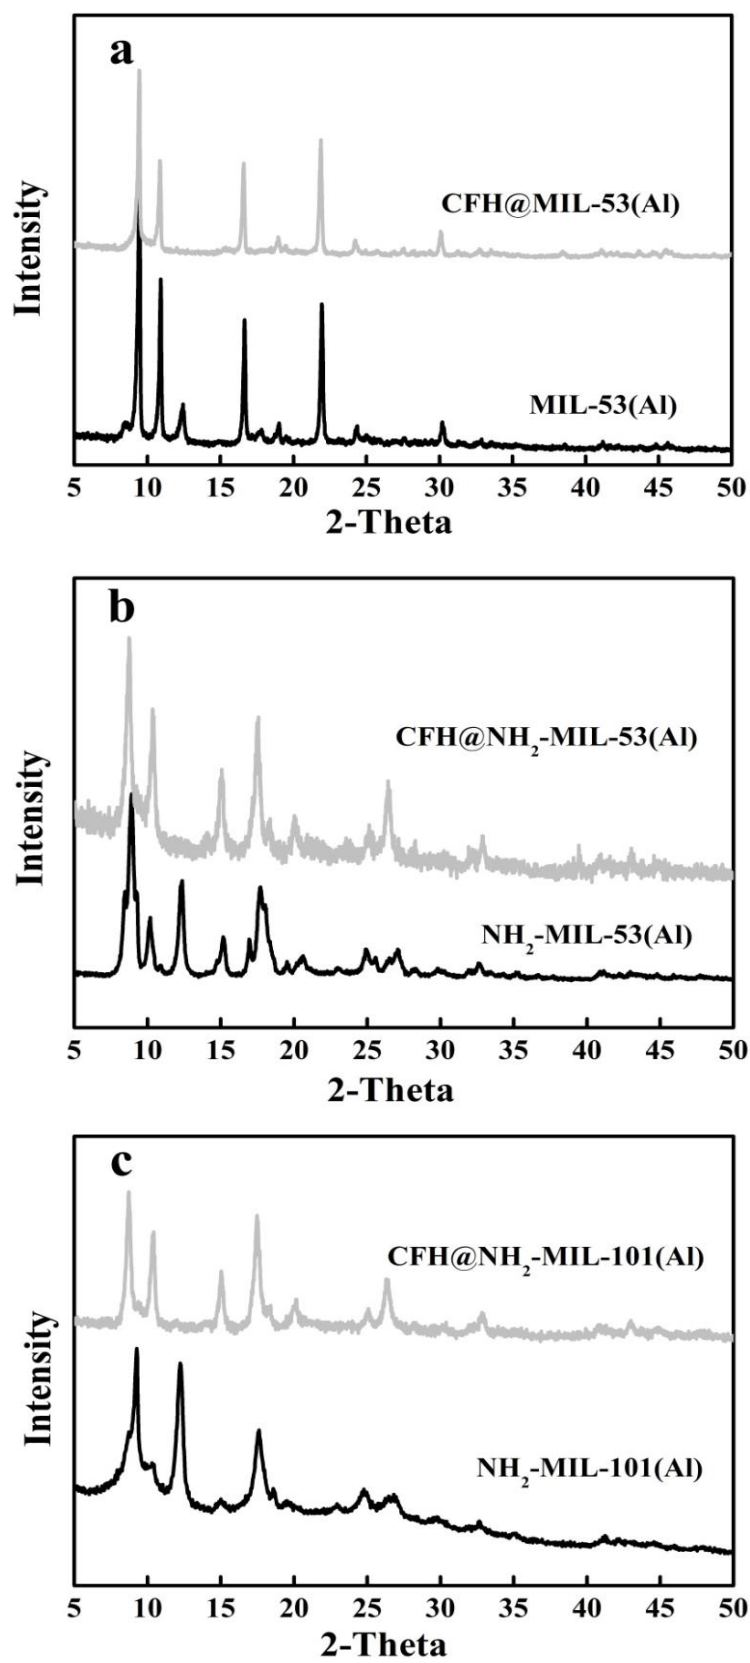

217

218

219

Figure S5 XRD spectrum of the different samples.

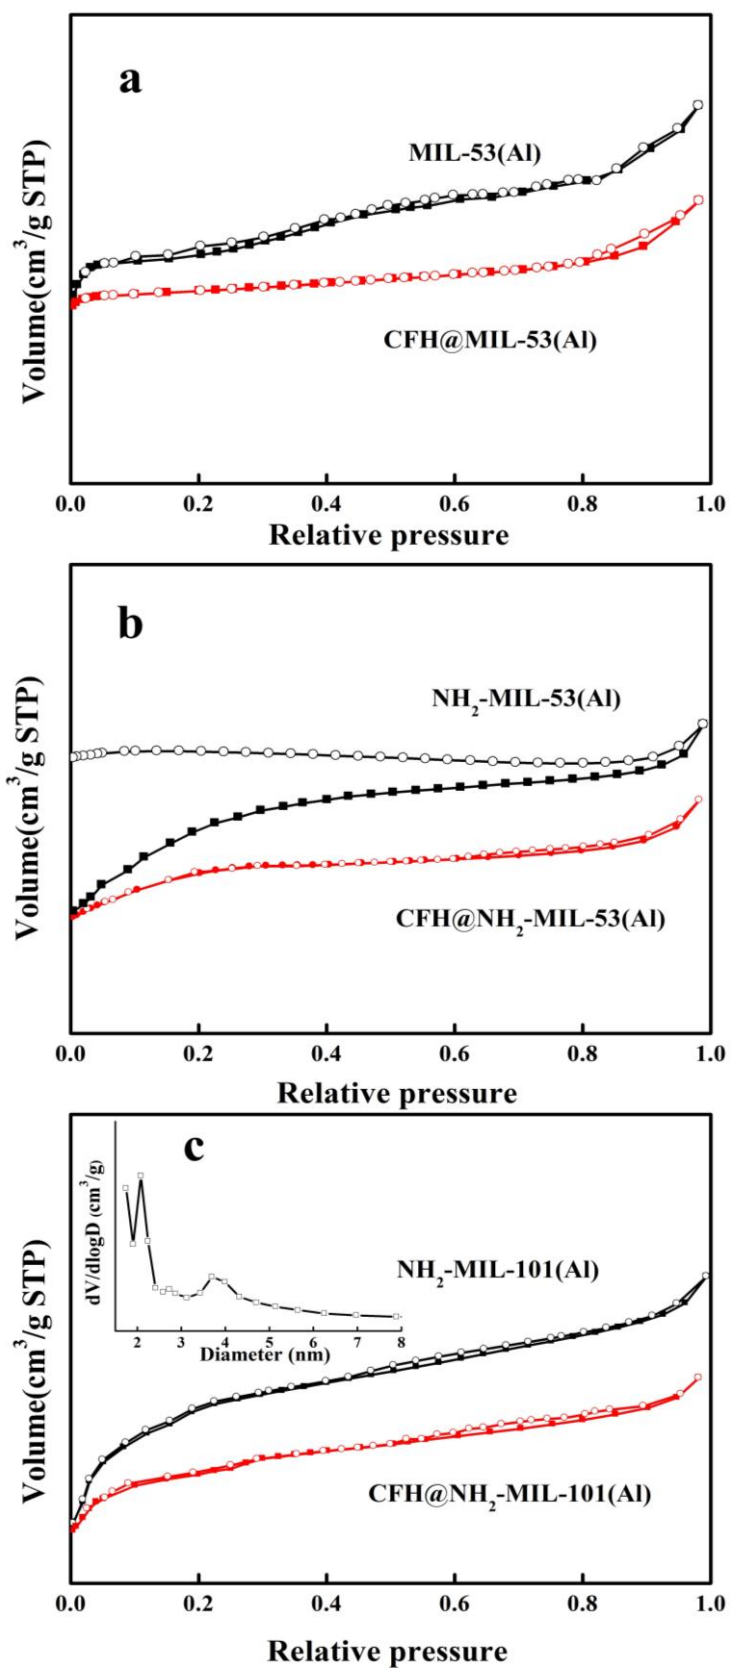

221

222

223

**Figure S6** Nitrogen adsorption/desorption isotherms and of different samples.

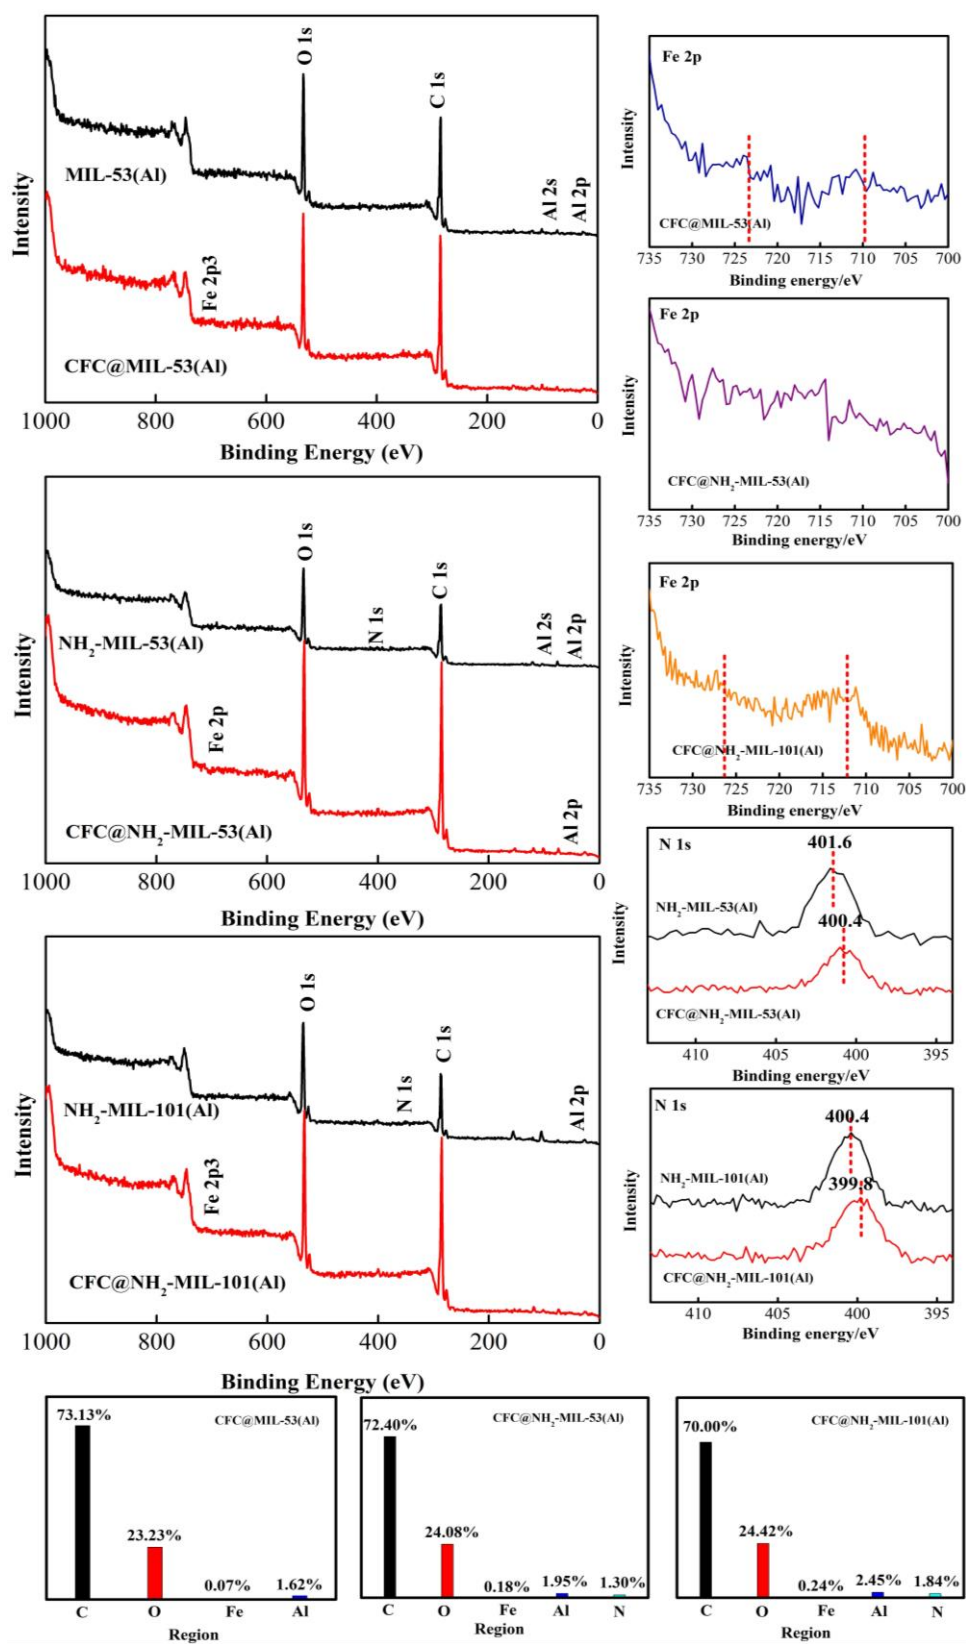

225

226

227

Figure S7 XPS spectra of different samples.

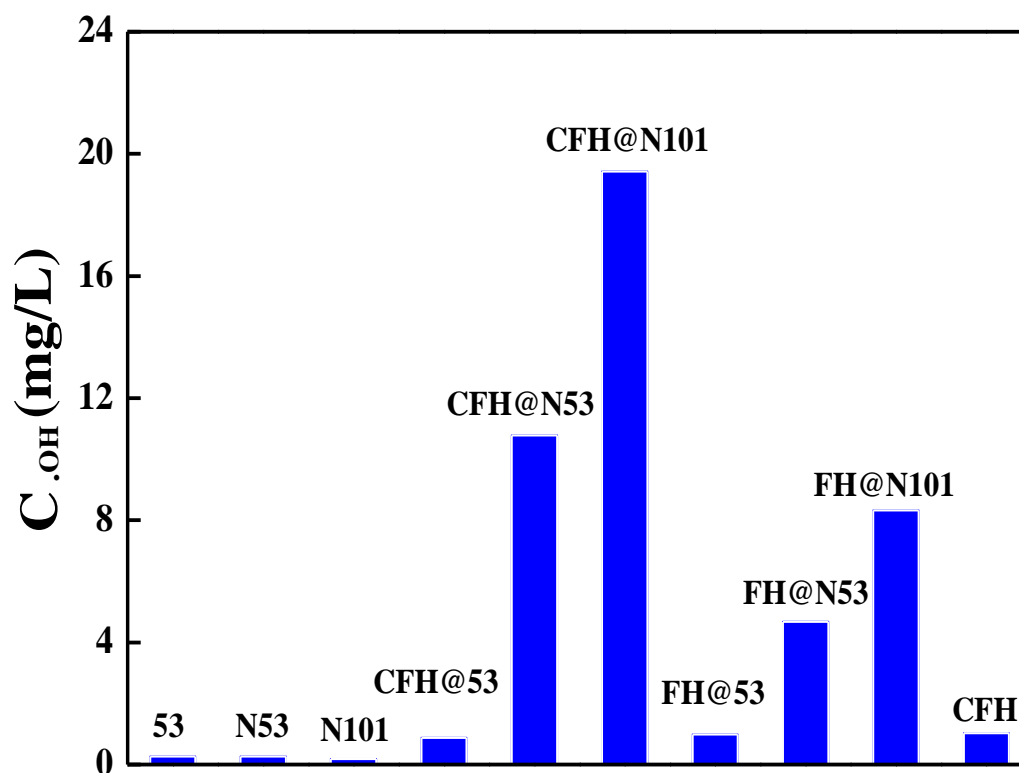

229

230

231 **Figure S8** Concentration of  $\bullet\text{OH}$  radicals in the oxidation system with different catalysts.

232

233 To better explore the influence of introduction of CA on activity of the catalysts, we also  
 234 prepared FH@NH<sub>2</sub>-MIL-53 or NH<sub>2</sub>-MIL-101 and investigated their photocatalytic ability. After  
 235 Fe-only loading treatment, an evident reduction in the production of  $\bullet\text{OH}$  was observed for these  
 236 two samples. It was surprisingly found that the leaching content of Fe ions for both samples was  
 237 over  $0.60 \text{ mg L}^{-1}$ , several times larger than that with CA adding. It well confirmed that the  
 238 addition of CA can not only greatly improved catalytic activity for splitting of H<sub>2</sub>O<sub>2</sub>, but also  
 239 provided strong binding force between metallic site and free amine moiety on Al-based MOFs.

240

241

242

243

244

245

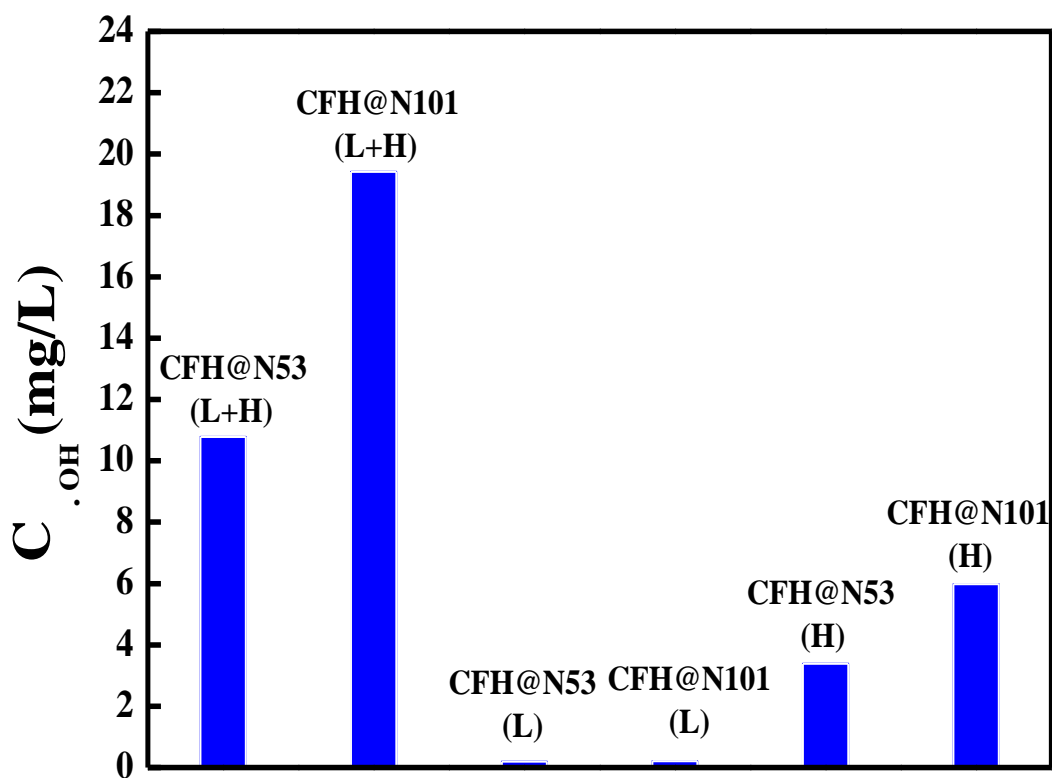

247

248

249

**Figure S9** Concentration of  $\cdot OH$  with different conditions and catalysts

250

(L= visible light; H=  $H_2O_2$ ).

251

252

253

254

255

256

257

258

259

260

261

262

263



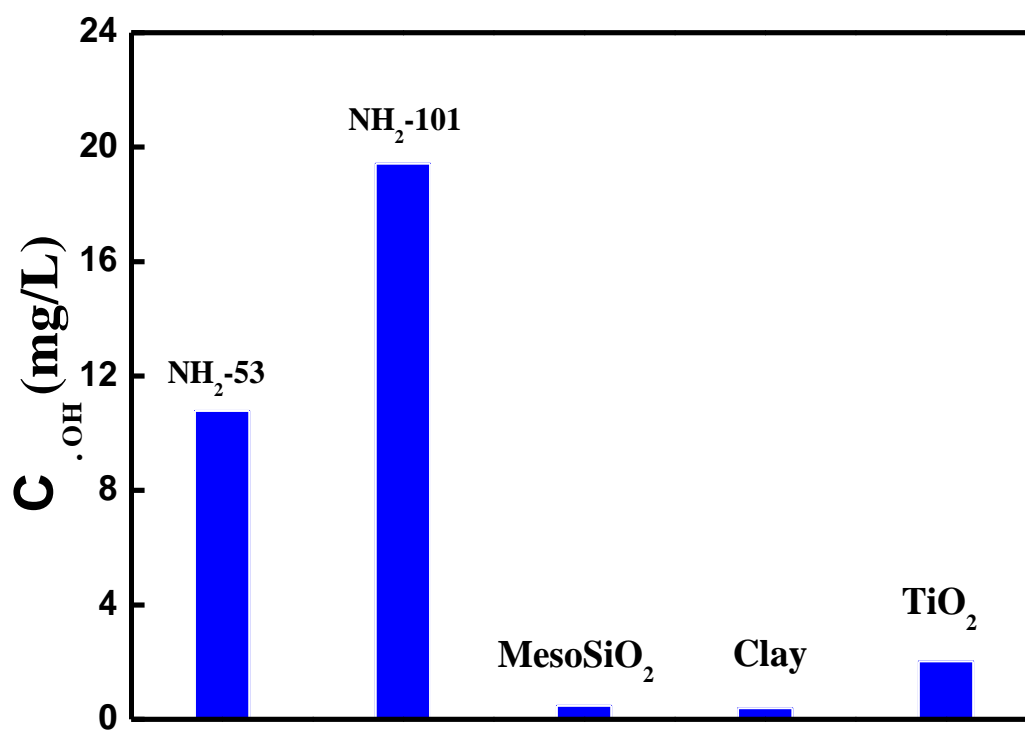

265

266

267 **Figure S10** Effect of the different supports decorated with Fe-C oxides NPs

268 on the generation of  $\cdot OH$ .

269

270

271

272

273

274

275

276

277

278

279

280

281

282

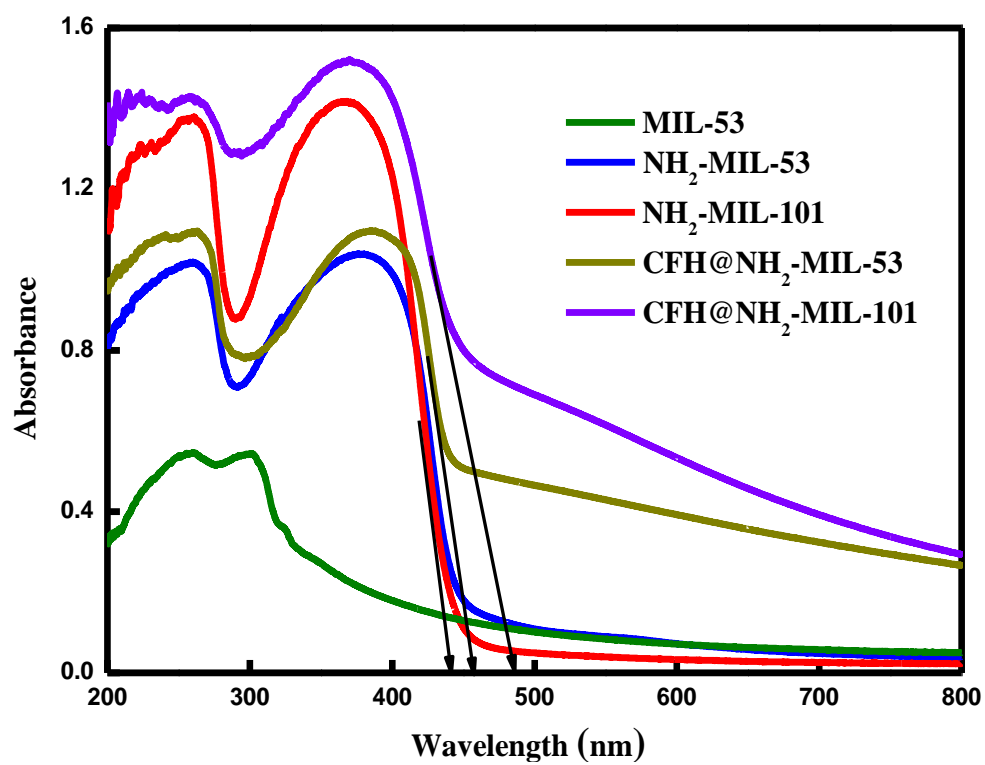

283

284

285 **Figure S11** UV–visible diffuse reflectance spectra of the different prepared samples.

286

287

288

289

290

291

292

293

294

295

296

297

298

299

300

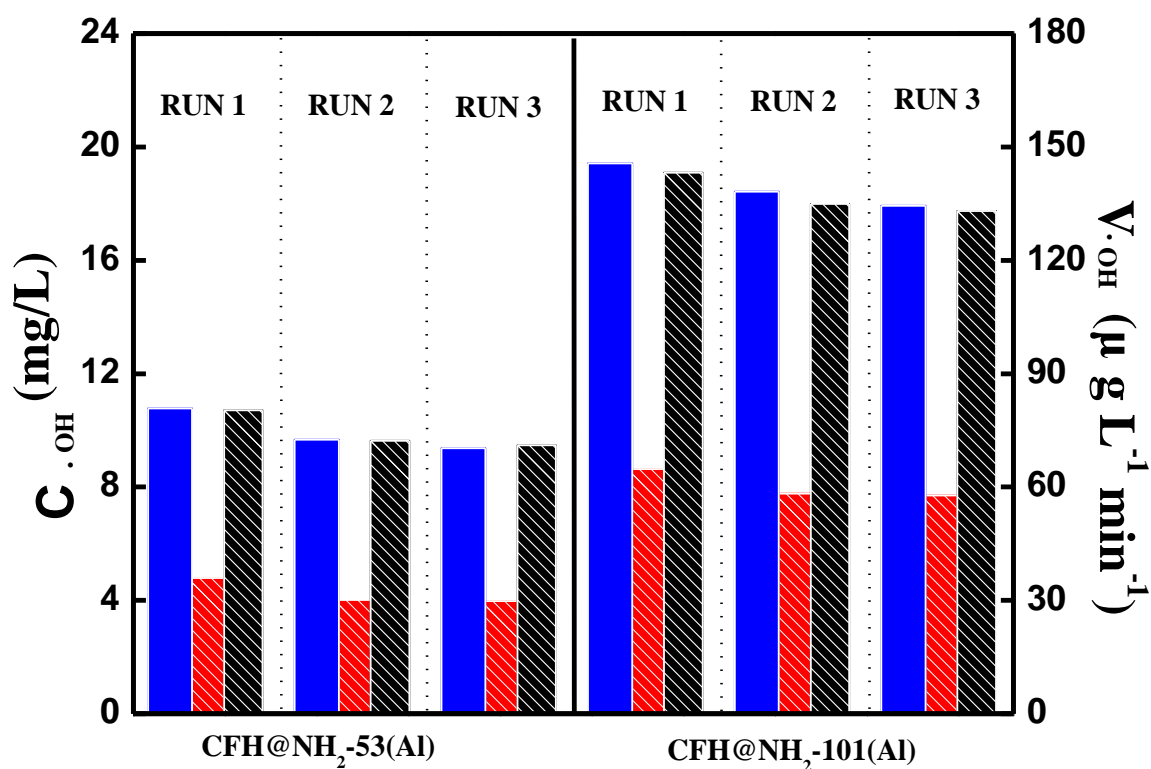

302

303

304 **Figure S12** Reusability of the CFH@MIL-53 (a) and CFH@MIL-101 (b) after subsequent  
 305 reactions (concentration (blue for 5 h) and generation rate (black for 0.5 h and red for 5 h)  
 306 of  $\bullet\text{OH}$  radicals).

307

308 During three catalytic runs, no significant loss in activity was presented for sample  
 309 NH<sub>2</sub>-MIL-101 and NH<sub>2</sub>-MIL-53 after careful washings with methanol and drying (Fig. S12 ESI†).  
 310 XRD and FTIR analysis reveals that the crystalline structure and surface properties of MOFs were  
 311 not destroyed after photocatalytic splitting (Fig. S13 ESI†). TEM images also pointed out NPs  
 312 uniformly deposited inside MOFs by multiple uses in catalysis, which demonstrates that the  
 313 covalent bonding between amine groups and Fe-CA complex made catalysts intensely oppose  
 314 photo-corrosion (Fig. S14 ESI†).

315

316

317

318

319

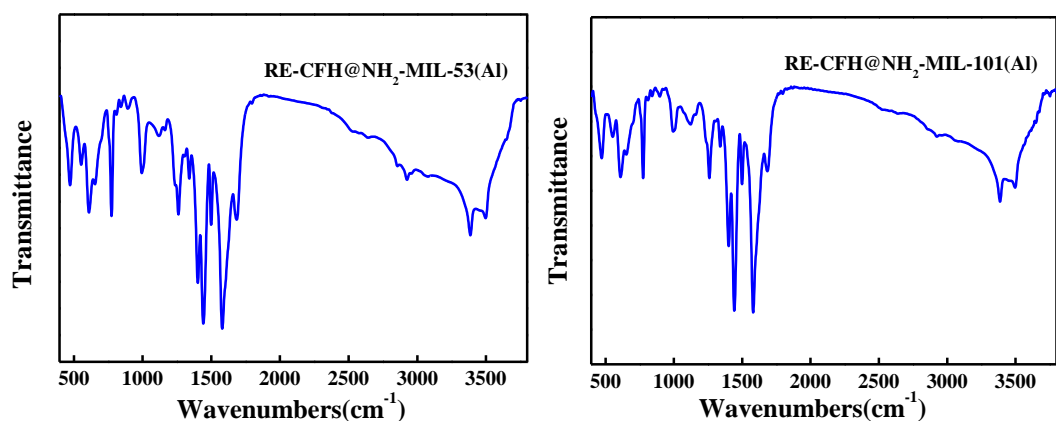

320

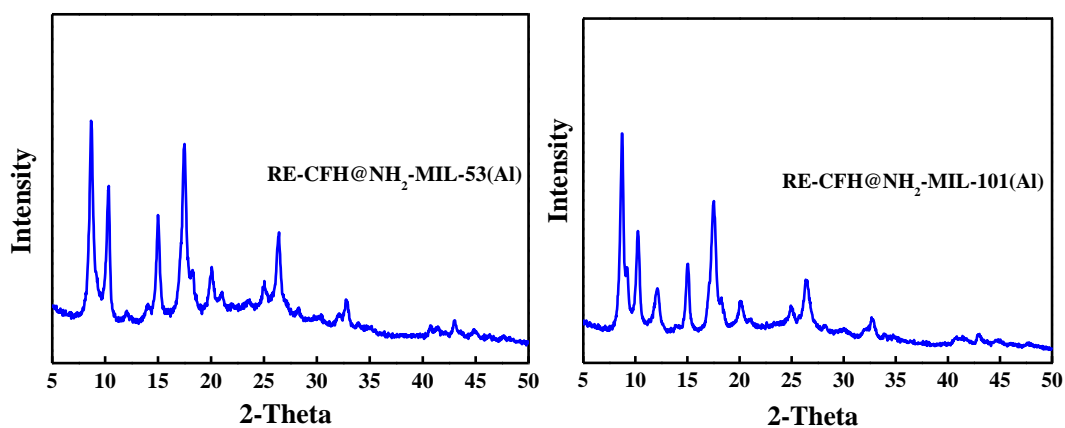

321

322

323

**Figure S13** FTIR and XRD spectrums of the samples reused.

324

325

326

327

328

329

330

331

332

333

334

335

336

337

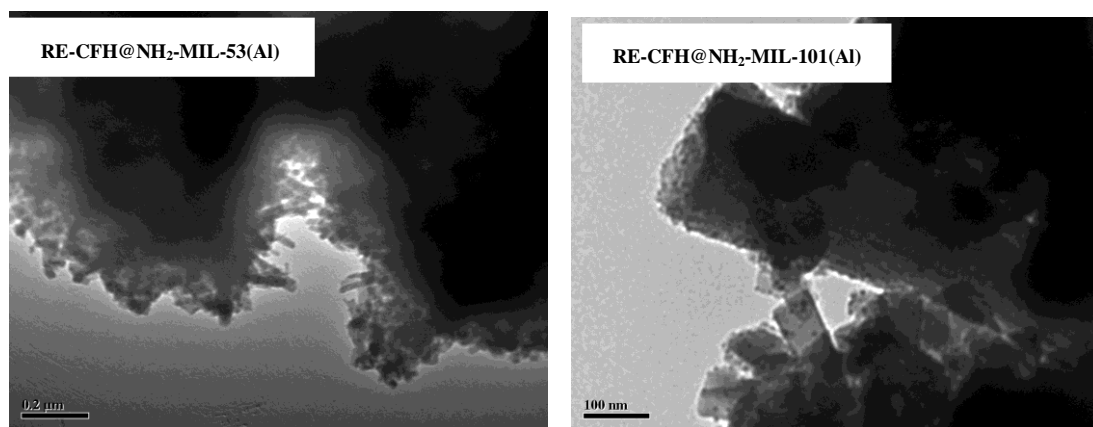

338

339

340

**Figure S14** TEM investigations of the reused samples.
